# Supplementary material for: Anti-Neuroinflammatory Effects of a Macrocyclic Peptide-Peptoid Hybrid in Lipopolysaccharide-Stimulated BV2 Microglial Cells
Source: MDPI journal article supplement (doi:10.3390/ijms25084462), 2024-04-18
Supplement: s1 [file s1]

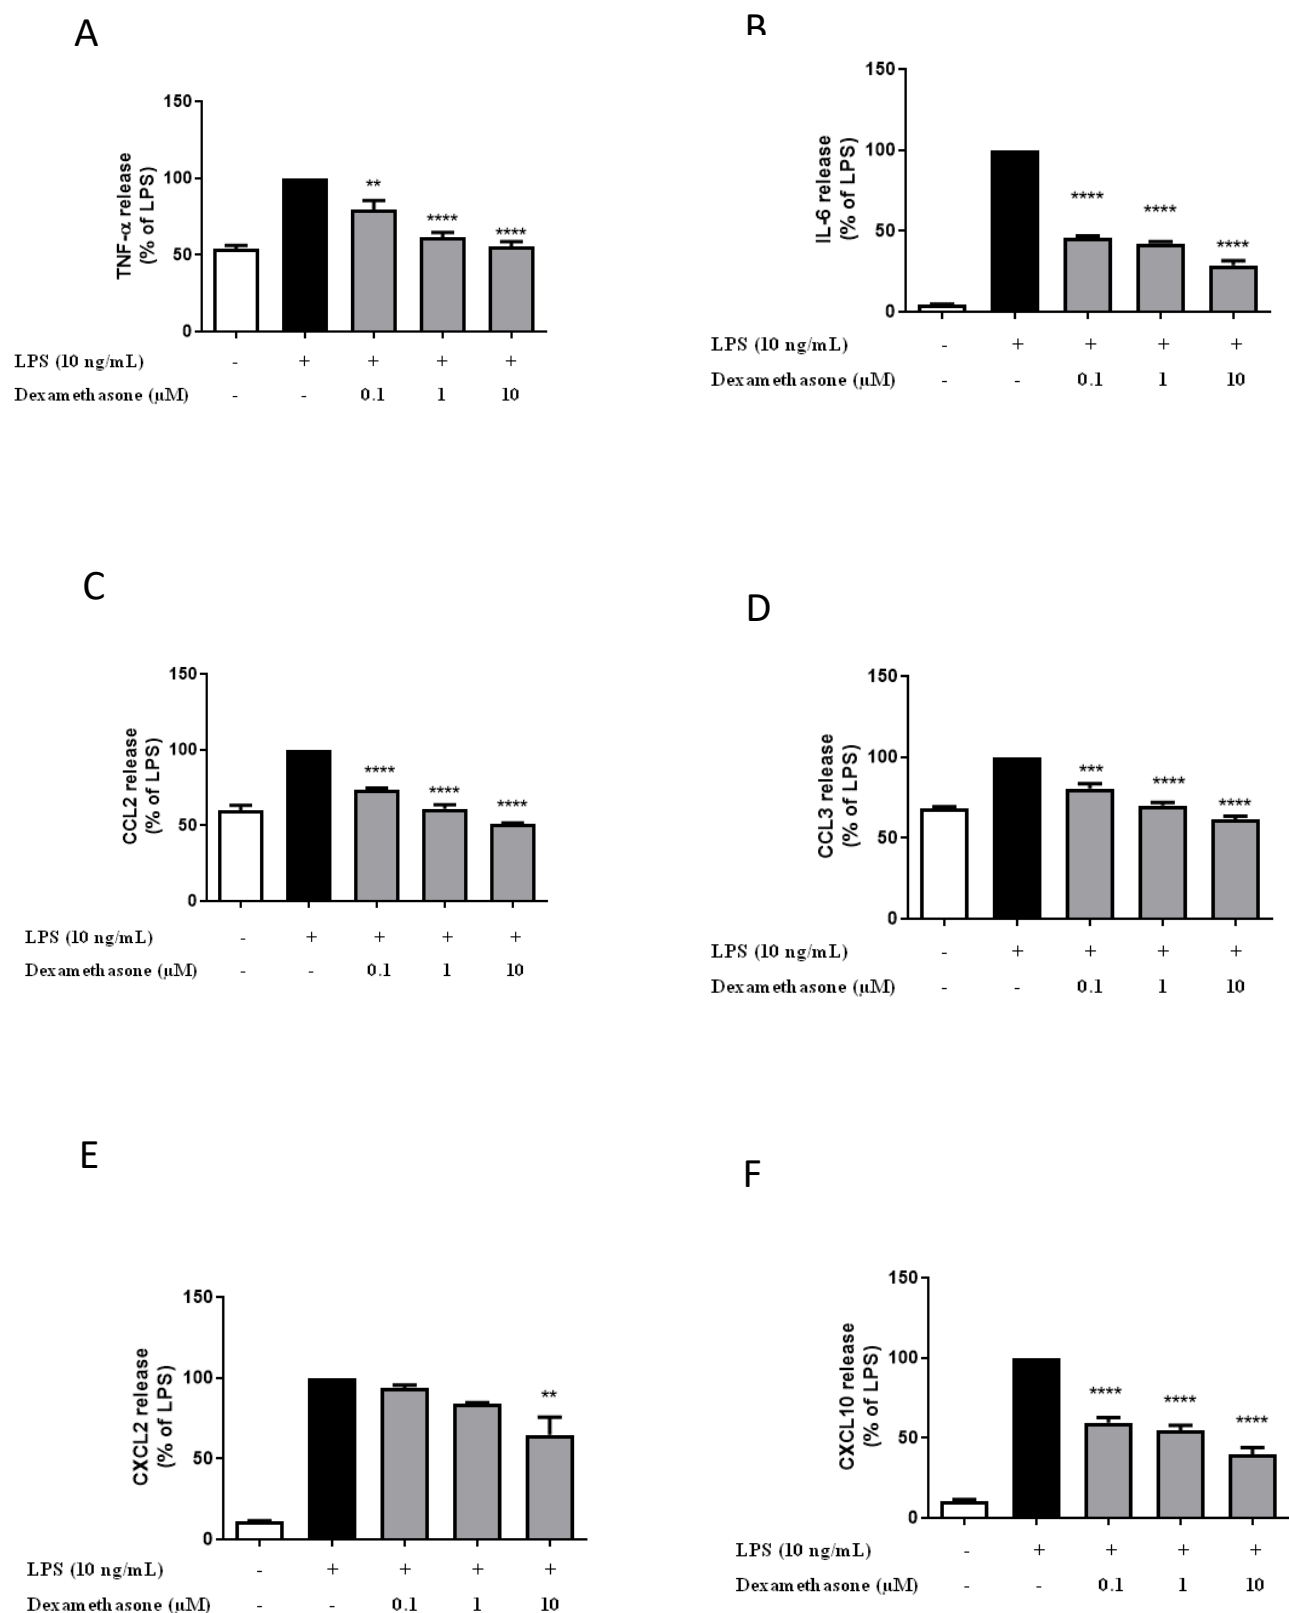

**Supplementary Figure S1.** Effects of dexamethasone on protein synthesis of TNF- $\alpha$  (A), IL-6 (B), CCL2 (C), CCL3 (D), CXCL2 (E), and CXCL10 (F) in LPS-stimulated BV2 cells. Cells were stimulated as described in the material and methods section. After 24 h of stimulation, supernatants were collected and the release of cytokines and chemokines was measured by ELISA. Values are presented as the mean  $\pm$  SD of at least three independent experiments. Statistical analysis was performed using one-way ANOVA with Dunnett's post hoc tests and \* $p < 0.05$ , \*\* $p < 0.01$ , \*\*\* $p < 0.001$ , and \*\*\*\* $p < 0.0001$ .

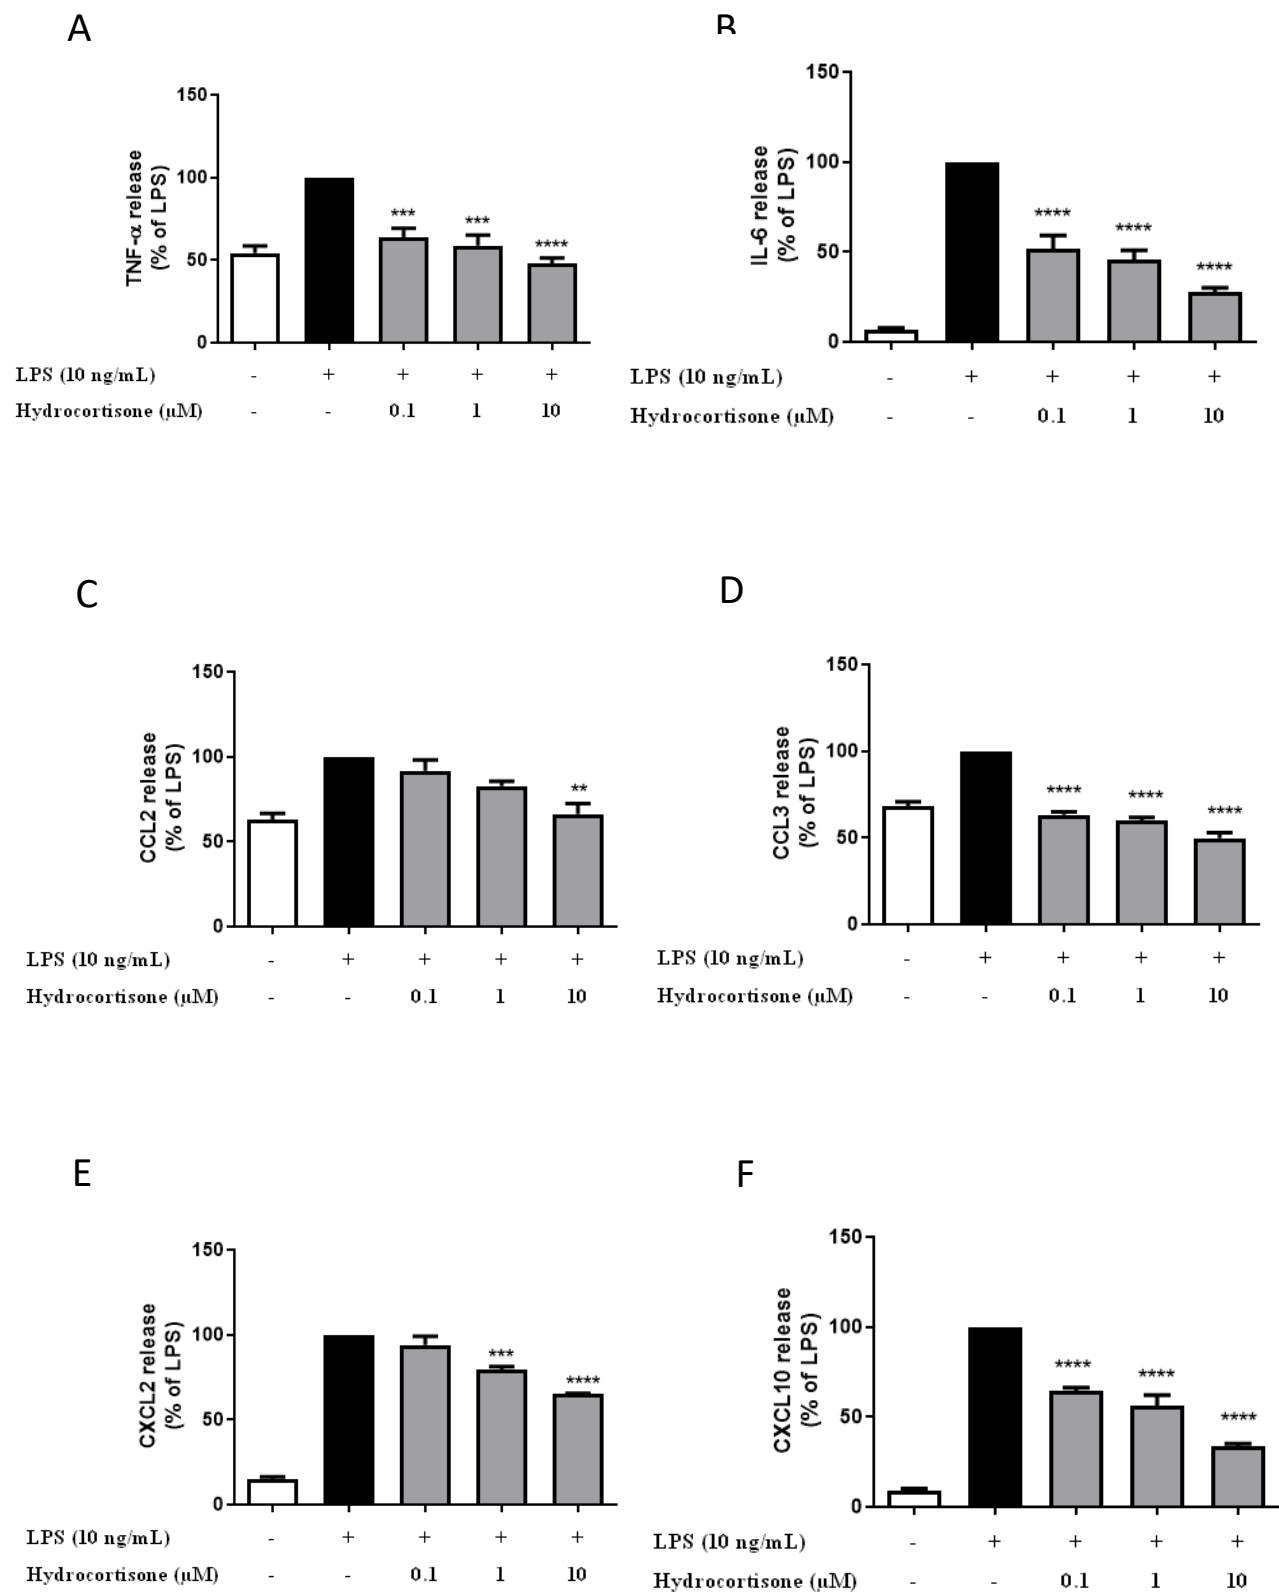

**Supplementary Figure S2.** Effects of hydrocortisone on protein synthesis of TNF-α (A), IL-6 (B), CCL2 (C), CCL3 (D), CXCL2 (E), and CXCL10 (F) in LPS-stimulated BV2 cells. Cells were stimulated as described in the material and methods section. After 24 h of stimulation, supernatants were collected and the release of cytokines and chemokines was measured by ELISA. Values are presented as the mean ± SD of at least three independent experiments. Statistical analysis was performed using one-way ANOVA with Dunnett's post hoc tests and \*\*p<0.01, \*\*\*p<0.001, and \*\*\*\*p<0.0001.
